# Supplementary material for: Metabolite profiling reveals a connection between aldehyde dehydrogenase 1A3 and GABA metabolism in breast cancer metastasis
Source: PubMed Central journal article supplement (PMC8739322; doi:10.1007/s11306-021-01864-6), 2022-01-06
Supplement: 11306_2021_1864_MOESM4_ESM.pdf [file 11306_2021_1864_MOESM4_ESM.pdf]

## Supplemental Figures

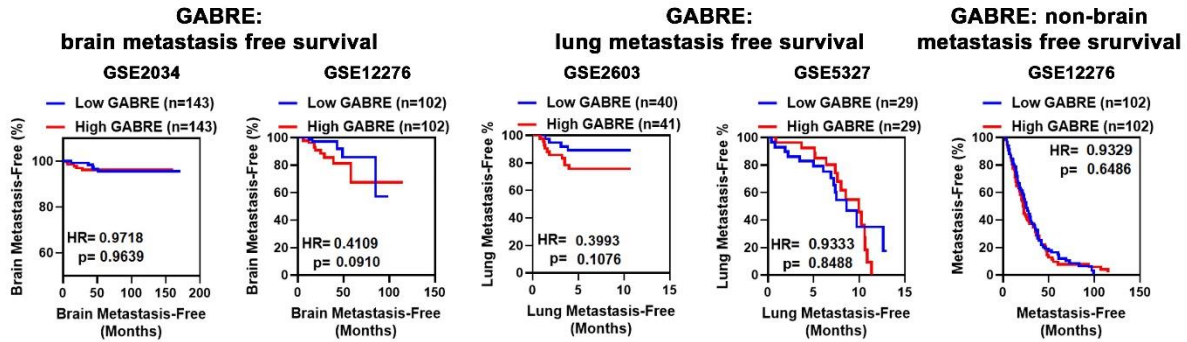

**Figure S1. GABRE expression does not correlate with metastasis development in breast cancer patients.** High and low expression of GABRE was categorized based on median expression for Kaplan-Meier metastasis-free survival analysis to the brain, lungs or to sites other than the brain for GSE2034 (Affymetrix Human Genome U133A Array log<sub>2</sub> expression from primary tumours of 286 lymph node negative breast cancer patients); GSE12276 (Affymetrix Human Genome U133 Plus 2.0 Array log<sub>2</sub> expression of 204 primary breast tumours from patients all of whom experienced local or distant relapse), GSE2603 (Affymetrix Human Genome U133A Array log<sub>2</sub> expression from primary tumours of 81 breast cancer patients), and GSE5327 (Affymetrix Human Genome U133A Array log<sub>2</sub> expression from 48 primary ER- breast tumours). HR = hazard ratio, p value calculated by log-rank test.
